# Supplementary material for: Synthesis of meta-substituted [18F]3-fluoro-4-aminopyridine via direct radiofluorination of pyridine N-oxides
Source: Royal Society of Chemistry journal article supplement (doi:10.1039/c6cc02362b), 2016-01-01
Supplement: c6cc02362b1.pdf [file c6cc02362b1.pdf]

## Synthesis of meta-substituted [ $^{18}\text{F}$ ]3-fluoro-4-aminopyridine via direct radiofluorination of pyridine N-oxides

P. Brugarolas<sup>a</sup>, R. Freifelder<sup>b</sup>, S.-H. Cheng<sup>b</sup>, and O. DeJesus<sup>c</sup>

<sup>a</sup>Department of Neurology, The University of Chicago, <sup>b</sup>Department of Radiology, The University of Chicago,

<sup>c</sup>Department of Medical Physics, The University of Wisconsin at Madison

\* corresponding author: [brugarolas@uchicago.edu](mailto:brugarolas@uchicago.edu)

### SUPPLEMENTAL METHODS

#### Complete experimental procedures

### SUPPLEMENTAL DATA

#### Reference NMR data of the used compounds

### SUPPLEMENTAL FIGURES

**Sup. Fig. 1.** Fluorination of 3-bromo-4-nitropyridine: **A.** UV HPLC trace. **B.**  $^1\text{H}$ ,  $^{13}\text{C}$ ,  $^{19}\text{F}$  NMR.

**Sup. Fig. 2.** Fluorination of 3-iodo-4-nitropyridine: **A.** UV HPLC trace. **B.**  $^1\text{H}$ ,  $^{13}\text{C}$ ,  $^{19}\text{F}$  NMR.

**Sup. Fig. 3.** Fluorination of 3-bromo-4-nitropyridine N-oxide: **A.** UV HPLC trace. **B.**  $^1\text{H}$ ,  $^{13}\text{C}$ ,  $^{19}\text{F}$  NMR.

**Sup. Fig. 4.** Fluorination of 3-bromopyridine: **A.** UV HPLC trace. **B.**  $^1\text{H}$ ,  $^{13}\text{C}$ ,  $^{19}\text{F}$  NMR.

**Sup. Fig. 5.** Fluorination of 3-bromopyridine N-oxide: **A.** UV HPLC trace. **B.**  $^1\text{H}$ ,  $^{19}\text{F}$ ,  $^{13}\text{C}$  NMR.

**Sup. Fig. 6.** Hydrogenation of 3-fluoro-4-nitropyridine N-oxide. UV HPLC before and after.

**Sup. Fig. 7.** Radioactive and UV HPLC trace of radiofluorination of 3-bromo-4-nitropyridine N-oxide (not spiked with reference standard)

SUPPLEMENTAL METHODS

All radioactivity procedures were approved by the Office of Radiation Safety at the University of Chicago. All chemicals were ordered from Sigma unless otherwise noted.

**HPLC conditions (A-F):**

**A.** Nucleodur 5  $\mu\text{m}$ , 4.6 x 250 mm C18ec (Macherey-Nagel). Flow 1.4 mL/min. Solvent A: 50 mM  $\text{NH}_4\text{HCO}_3$ , pH 8.0. Solvent B: 100% MeOH. Method: 0-2 min: 5% B, 2-6 min: 5-50% B, 6-12 min: 50% B, 12-12.5 min: 50-5% B, 12.5-17 min: 5% B.

**B.** Nucleodur 5  $\mu\text{m}$ , 4.6 x 250 mm C18ec (Macherey-Nagel). Flow 1.4 mL/min. Solvent A: 50 mM  $\text{NH}_4\text{HCO}_3$ , pH 8.0. Solvent B: 100% MeOH. Method: 0-2 min: 1% B, 2-9 min: 1-20% B, 9-11 min: 20% B, 11-11.5 min: 20-1% B, 11.5-14 min: 5% B.

**C.** Eclipse XDB 5  $\mu\text{m}$ , 9.4 x 250 mm C18 column (Agilent). Flow 4: mL/min. Mobile phase: 50 mM  $\text{NaH}_4\text{PO}_4$ , 10 mM triethylamine, pH 8.0, 5% EtOH. Isocratic: 0-20 min.

**D.** Eclipse XDB 5  $\mu\text{m}$ , 9.4 x 250 mm C18 column (Agilent). Flow: 4 mL/min. Solvent A: 50 mM  $\text{NH}_4\text{HCO}_3$ , pH 8.0. Solvent B: 100% MeOH. Method: 0-14 min: 5% B, 14-17 min: 5-25% B, 17-19 min: 25% B, 19-20 min: 25-5% B, 20-25 min: 5% B.

**E.** Eclipse XDB 5  $\mu\text{m}$ , 9.4 x 250 mm C18 column (Agilent). Flow 4: mL/min. Mobile phase: 50 mM  $\text{NaH}_4\text{PO}_4$ , 10 mM triethylamine, pH 8.0, 5% EtOH. Isocratic: 0-10 min.

**F.** Acclaim 5  $\mu\text{m}$ , 4.6 x 150 mm C18 column (Thermo Scientific). Flow 0.6: mL/min. Mobile phase:  $\text{H}_2\text{O}$  0.1% TFA, 5% MeOH. Isocratic: 0-6 min.

**RadioTLC analysis:** The radioactive sample was spotted on a 25 \* 75 mm TLC plate (PE SIL G, Whatman) next to the non-radioactive standard (1 mg/mL). The TLC was run in 95:5 methanol:acetic acid. The reference standard was visualized using a handheld UV-lamp and the radioactive spot measured with radio-TLC scanner (Eckert & Ziegler).

**Non-radioactive fluorination of 3-bromo-4-nitropyridine (3):** 10  $\mu\text{L}$  of 1 M tetrabutylammonium fluoride (TBAF) solution in THF (10  $\mu\text{mol}$ , 0.5 eq.) was added to a solution of 3-bromo-4-nitropyridine (96%, Aurum Pharmatech, LLC) (20  $\mu\text{mol}$ , 1 eq.) in 500  $\mu\text{L}$  of anhydrous dimethylsulfoxide (DMSO) in a 2 mL HPLC vial. The reaction was analyzed by HPLC (conditions A). Retention times: 3-bromo-4-nitropyridine (**3**) = 10.83 min, 3-fluoro-4-nitropyridine = 8.38, 3-bromo-4-fluoropyridine (**6**) = 11.76 min. Retention times for the product matched within 0.05 min the reference standard. Identity of the product was confirmed by HR-MS ( $m/z M^+$  exp.: 174.9423, calc: 174.9433) and  $^1\text{H}$ ,  $^{13}\text{C}$  and  $^{19}\text{F}$  NMR. Product amount was calculated from the area under the curve of the HPLC UV1 trace using a calibration curve.

**Non-radioactive fluorination of 3-iodo-4-nitropyridine (4):** 10  $\mu\text{L}$  of 1 M TBAF solution in THF (10  $\mu\text{mol}$ , 0.5 eq.) was added to a solution of 3-iodo-4-nitropyridine (96%, Aurum Pharmatech, LLC) (20  $\mu\text{mol}$ , 1 eq.) in 500  $\mu\text{L}$  of anhydrous dimethylsulfoxide (DMSO) in a 2 mL HPLC vial. The reaction was analyzed by HPLC (conditions A). Retention times: 3-iodo-4-aminopyridine (**4**) = 11.02 min, 3-iodo-4-fluoropyridine (**7**) = 13.43 min. Starting material absorbs at 254 and 313 nm. Product does not absorb at 313 nm. The product identity of the product was confirmed by HR-MS ( $m/z M^+$  exp.: 222.9288, calc: 222.9294) and  $^1\text{H}$ ,  $^{13}\text{C}$  and  $^{19}\text{F}$  NMR.

**Non-radioactive fluorination of 3-bromopyridine N-oxide (8):** 10  $\mu\text{L}$  of 1 M TBAF solution in THF (10  $\mu\text{mol}$ , 0.5 eq.) was added to a solution of a 3-bromo-4-nitropyridine N-oxide (98+%, Alfa Aesar) (20  $\mu\text{mol}$ , 1 eq.) in 500  $\mu\text{L}$  of anhydrous DMSO in a 2 mL HPLC vial. The reaction was analyzed by HPLC (conditions B). Retention times: 3-bromo-4-nitropyridine N-oxide (**8**) = 11.84 min, 3-fluoro-4-nitropyridine N-oxide (**9**) = 7.93 min. Retention time for the product matched within 0.05 min the reference standard. Identity of the product was confirmed by HR-MS ( $m/z M^+$  exp.: 158.0141, calc.: 158.0128) and  $^1\text{H}$ ,  $^{13}\text{C}$  and  $^{19}\text{F}$  NMR. Product amount was calculated from the area under the curve of the HPLC UV2 trace using a calibration curve.

**Reaction of 3-bromopyridine (11) with TBAF:** 120  $\mu\text{L}$  of 1 M TBAF solution in THF (120  $\mu\text{mol}$ , 1.2 eq.) was added to a solution of a 3-bromopyridine (97%, Combi-Blocks) (100  $\mu\text{mol}$ , 1 eq.) in

400  $\mu\text{L}$  of anhydrous DMSO in a 2 mL HPLC vial. The reaction was heated to 120 C for 30 min and analyzed by HPLC (conditions F) and  $^1\text{H}$ ,  $^{13}\text{C}$  and  $^{19}\text{F}$  NMR. Retention times: 3-bromopyridine (**11**) = 4.31 min, 3-fluoropyridine (**12**) = 1.56 min. No product was detected by HPLC or NMR.

**Reaction of 3-bromopyridine N-oxide (**13**) with TBAF:** 120  $\mu\text{L}$  of 1 M TBAF solution in THF (120  $\mu\text{mol}$ , 1.2 eq.) was added to a solution of a 3-bromopyridine N-oxide (97%, Alfa-Aesar) (100  $\mu\text{mol}$ , 1 eq.) in 400  $\mu\text{L}$  of anhydrous DMSO in a 2 mL HPLC vial. The reaction was heated to 120 C for 30 min and analyzed by HPLC (conditions F) and  $^1\text{H}$ ,  $^{13}\text{C}$  and  $^{19}\text{F}$  NMR. Retention times: 3-bromopyridine N-oxide (**13**) = 3.46 min, 3-fluoropyridine N-oxide (**14**) = 1.42 min. Yield was determined based on  $^1\text{H}$ -NMR and HPLC.

**Catalytic hydrogenation of 3-fluoro-4-nitropyridine N-oxide (**9**):** 0.1 mg of 3-fluoro-4-aminopyridine N-oxide (**9**) were dissolved in 4 mL of MeOH in a 50 mL round bottom flask containing a stir bar. While stirring, 3-4 mg of 10% Pd/C (dry basis) was added and the flask sealed with a rubber septum. The vial was evacuated and backfilled with hydrogen gas from a balloon and the mixture was allowed to react for 10 min. After 10 min, the suspension was passed through a 0.4  $\mu\text{m}$  PTFE filter and analyzed by HPLC (conditions C). Reference retention times: 3-fluoro-4-aminopyridine N-oxide (**9**) = 5.80 min, 3-fluoro-4-aminopyridine (**10**) = 7.05 min. Retention time for the product matched within 0.05 min the reference standard. Identity of the product was confirmed by HR-MS ( $m/z$   $M^+$  exp.: 112.0416, calc: 112.0437). Product amount was calculated from the area under the curve of the HPLC UV2 trace using a calibration curve.

**Procurement of [ $^{18}\text{F}$ ]fluoride:** Cyclotron produced no-carrier-added aqueous [ $^{18}\text{F}$ ]fluoride was obtained from IBA Molecular North America, Inc.

**Production of tetrabutyl ammonium [ $^{18}\text{F}$ ]fluoride ([ $^{18}\text{F}$ ]TBAF):** Fifty to a hundred mCi (1.85 – 3.7 GBq) of cyclotron produced  $^{18}\text{F}^-$  were trapped in a Sep-Pak Accell Plus QMA Plus Light Cartridge (Waters Corporation) preconditioned with 5 mL of 50 mM of  $\text{KHCO}_3$  followed by 10 mL of water and 20 mL of air. The cartridge was eluted with a solution containing of 300  $\mu\text{L}$  of 50

mM TBA-HCO<sub>3</sub> in water with 5% EtOH (ABX advanced biochemical compounds GmbH) and 600 µL of acetonitrile (MeCN). The water-MeCN solution was dried azeotropically at 85 °C under reduced pressure (20 mbar) for 7.5 min. To ensure complete dryness two additional aliquots of MeCN (500 µL) followed by evaporation (3 min) were performed. After drying, the vial was filled with argon gas and cooled down to room temperature in a water beaker. The [<sup>18</sup>F]TBAF residue was dissolved in 100-400 µL of anhydrous DMSO and used for the reactions. Radiochemical synthesis of [<sup>18</sup>F]3-fluoro-4-nitropyridine N-oxide ([<sup>18</sup>F]**9**) from 3-bromo-4-nitropyridine N-oxide (**8**): 100 µL of 3-bromo-4-nitropyridine N-oxide (**8**) dissolved in DMSO (20 mg/mL) were added to 100 µL of [<sup>18</sup>F]TBAF solution (~10 mCi, ~370 MBq) in 3 mL microreactor vial and allowed to react for 15 min. 100 µL of this solution with or without reference standard (20 µg) were injected into a semiprep C-18 HPLC column equipped with a variable wavelength UV-Vis detector and a radiation detector (conditions C). The radioactive peaks were collected and the radioactivity of each fraction measured using a Capintec dose calibrator. The radiochemical yield was calculated as radioactivity in the peak corrected for decay over radioactivity injected.

**Radiochemical synthesis of [<sup>18</sup>F]3-fluoro-4-nitropyridine N-oxide ([<sup>18</sup>F]**9**) from 3-fluoro-4-nitropyridine N-oxide (**9**) by <sup>19</sup>F/<sup>18</sup>F exchange:** 100 µL of 3-fluoro-4-nitropyridine N-oxide (**9**) dissolved in DMSO (1 mg/mL) were added to 100 µL of [<sup>18</sup>F]TBAF solution (~10 mCi, ~370 MBq) in 3 mL microreactor vial and allowed to react for 1 min. 100 µL of this solution were injected into a semiprep C-18 HPLC column equipped with a variable wavelength UV-Vis detector and a radiation detector (conditions E). The radioactive peaks were collected and the radioactivity of each fraction measured using a Capintec dose calibrator. The radiochemical yield was calculated as radioactivity in the peak corrected for decay over radioactivity injected.

**Synthesis of [<sup>18</sup>F]3-fluoro-4-aminopyridine ([<sup>18</sup>F]**10**):** 1-10 mCi (37-370 MBq) of [<sup>18</sup>F]3-fluoro-4-aminopyridine N-oxide ([<sup>18</sup>F]**9**) containing 20-100 µg of cold 3-fluoro-4-aminopyridine N-oxide were dissolved in 4 mL of MeOH and the reaction was carried out as described above. The

presence of cold compound facilitated obtaining reproducible yields. The product was purified by semiprep HPLC (conditions D). The final specific activity was 10-100 mCi/ $\mu$ mol (0.37-3.7 GBq/ $\mu$ mol).

## SUPPLEMENTAL DATA

**Reference NMR data of the used compounds.****3-bromo-4-nitropyridine (3):**

$^1\text{H-NMR}$  ( $d_6$ -DMSO, 500 MHz)  $\delta$  (ppm): 8.06 (1H, t,  $J = 1.3$  Hz), 8.85 (1H, d,  $J = 1.3$  Hz), 9.11 (1 H, s).  $^{13}\text{C-NMR}$  ( $d_6$ -DMSO, 125 MHz)  $\delta$ : (ppm) 110.1 (s), 118.5 (s), 150.8 (s), 150.9 (s), 154.3 (s).

**3-iodo-4-nitropyridine (4):**

$^1\text{H-NMR}$  ( $d_6$ -DMSO, 500 MHz)  $\delta$  (ppm): 7.99 (1H, d,  $J = 5.2$  Hz), 8.80 (1H, d,  $J = 5.2$  Hz), 9.23 (1 H, s).  $^{13}\text{C-NMR}$  ( $d_6$ -DMSO, 125 MHz)  $\delta$  (ppm): 83.5 (s), 118.2 (s), 150.0 (s), 158.4 (s), 159.8 (s).

**3-fluoro-4-nitropyridine (5):**

$^1\text{H-NMR}$  ( $d_6$ -DMSO, 500 MHz)  $\delta$  (ppm): 8.13 (1H, t,  $J = 6.2$  Hz), 8.75 (1H, d,  $J = 5.25$  Hz), 9.03 (1 H, d,  $J = 2.9$  Hz).  $^{13}\text{C-NMR}$  ( $d_6$ -DMSO, 125 MHz)  $\delta$  (ppm): 118.4 (d,  $J = 4.8$  Hz), 141.8 (d,  $J = 23.1$  Hz), 141.9 (d,  $J = 23.1$  Hz), 147.5 (d,  $J = 6.7$  Hz), 149.7 (d,  $J = 269.5$  Hz).  $^{19}\text{F-NMR}$  ( $d_6$ -DMSO, 470 MHz)  $\delta$  (ppm): -135.13 (dd,  $J_2 = 8.9$  Hz,  $J_1 = 2.5$  Hz).

**3-bromo-4-fluoropyridine (6):**

$^1\text{H-NMR}$  ( $d_6$ -DMSO, 500 MHz)  $\delta$  (ppm): 7.50 (1H, dd,  $J_2 = 9.0$  Hz,  $J_1 = 5.5$  Hz), 8.56 (1H, dd,  $J_2 = 7.5$  Hz,  $J_1 = 5.5$  Hz), 8.81 (1 H,  $J: 9.5$  Hz).  $^{13}\text{C-NMR}$  ( $d_6$ -DMSO, 125 MHz)  $\delta$  (ppm): 106.0 (s), 112.9 (d,  $J: 16.2$  Hz), 151.1 (d,  $J: 6.2$  Hz), 153.5 (s), 165.0 (d,  $J: 275.4$  Hz).  $^{19}\text{F-NMR}$  ( $d_6$ -DMSO, 470 MHz)  $\delta$  (ppm): -99.1 (dd,  $J_2 = 16.9$  Hz,  $J_1 = 9.1$  Hz).

**3-bromo-4-nitropyridine N-oxide (8):**

$^1\text{H-NMR}$  ( $d_6$ -DMSO, 500 MHz)  $\delta$  (ppm): 8.15 (1H, d,  $J = 7.1$  Hz), 8.38 (1H, dd,  $J_2 = 7.1$  Hz,  $J_1 = 2.0$  Hz), 8.85 (1 H, d,  $J = 1.9$  Hz).  $^{13}\text{C-NMR}$  ( $d_6$ -DMSO, 125 MHz)  $\delta$  (ppm): 100? (s), 122.8 (s), 139.2 (s), 142.7 (s), 154.3 (s).

**3-fluoro-4-nitropyridine N-oxide (9):**

$^1\text{H-NMR}$  ( $d_6$ -DMSO, 500 MHz)  $\delta$  (ppm): 8.24 (1H, dd,  $J_2 = 31.6$  Hz,  $J_1 = 0.8$  Hz), 8.25 (1H, dd,  $J_2 = 35.1$  Hz,  $J_1 = 1.8$  Hz), 8.91 (1 H, dd,  $J_2 = 7.1$  Hz,  $J_1 = 1.8$  Hz).  $^{13}\text{C-NMR}$  ( $d_6$ -DMSO, 125 MHz)  $\delta$  (ppm): 122.3 (s), 131.4 (s), 131.7 (s), 137.0 (d,  $J = 4.3$  Hz), 153.3 (d,  $J = 264.8$  Hz).  $^{19}\text{F-NMR}$  ( $d_6$ -DMSO, 470 MHz)  $\delta$  (ppm): -126.7 (dd,  $J_2 = 8.5$  Hz,  $J_1 = 0.8$  Hz).

**3-bromopyridine (11):**

$^1\text{H-NMR}$  ( $d_6$ -DMSO, 500 MHz)  $\delta$  (ppm): 7.38 (1H, dd,  $J_2 = 8.1$  Hz,  $J_1 = 3.5$  Hz), 7.85 (1H, dt,  $J_2 = 8.2$  Hz,  $J_1 = 1.0$  Hz), 8.56 (1 H, m), 8.69 (1 H, d,  $J = 2.3$  Hz).  $^{13}\text{C-NMR}$  ( $d_6$ -DMSO, 125 MHz)  $\delta$  (ppm): 120.3 (s), 124.9 (s), 138.2 (s), 147.6 (s), 150.1 (s).

**3-fluoropyridine (12):**

$^1\text{H-NMR}$  ( $d_6$ -DMSO, 500 MHz)  $\delta$  (ppm): 7.40 (1H, m), 7.60 (1H, dt,  $J_2 = 7.5$  Hz,  $J_1 = 1.5$  Hz), 8.41 (1 H, m), 8.50 (1 H, d,  $J = 3.0$  Hz).  $^{13}\text{C-NMR}$  ( $d_6$ -DMSO, 125 MHz)  $\delta$  (ppm): 122.8 (d,  $J = 17.7$  Hz), 124.9 (d,  $J = 3.9$  Hz), 137.7 (d,  $J = 22.5$  Hz), 145.8 (d,  $J = 4.1$  Hz), 159.2 (d,  $J = 252.8$  Hz).  $^{19}\text{F-NMR}$  ( $d_6$ -DMSO, 470 MHz)  $\delta$  (ppm): -126.7 (t,  $J = 5.1$  Hz).

**3-bromopyridine N-oxide (13):**

$^1\text{H-NMR}$  ( $d_6$ -DMSO, 500 MHz)  $\delta$  (ppm): 7.37 (1H, t,  $J = 7.8$  Hz), 7.58 (1H, d,  $J = 7.6$  Hz), 8.25 (1 H, d,  $J = 7.1$  Hz), 8.56 (1 H, s).  $^{13}\text{C-NMR}$  ( $d_6$ -DMSO, 125 MHz)  $\delta$  (ppm): 120.0 (s), 127.0 (s), 128.3 (s), 138.3 (s), 140.0 (s).

**3-fluoropyridine N-oxide (14):**

$^1\text{H-NMR}$  ( $d_6$ -DMSO, 500 MHz)  $\delta$  (ppm): 7.40 (1H, dt,  $J_2 = 55.4$  Hz,  $J_1 = 7.9$  Hz), 7.42 (1H, dd,  $J_2 = 54.5$  Hz,  $J_1 = 7.2$  Hz), 8.13 (1 H, d,  $J = 6.4$  Hz), 8.51 (1 H, s).  $^{13}\text{C-NMR}$  ( $d_6$ -DMSO, 125 MHz)  $\delta$  (ppm): 113.2 (d,  $J = 20.4$  Hz), 126.6 (d,  $J = 10.0$  Hz), 129.2 (d,  $J = 35.5$  Hz), 136.2 (s), 160.2 (d,  $J = 247.9$  Hz).  $^{19}\text{F-NMR}$  ( $d_6$ -DMSO, 470 MHz)  $\delta$  (ppm): -122.1 (td,  $J_2 = 5.3$  Hz,  $J_1 = 0.8$  Hz).



## SUPPLEMENTAL DATA

## Sup. Fig. 1. Fluorination of 3-bromo-4-nitropyridine.

## 1A. UV HPLC trace

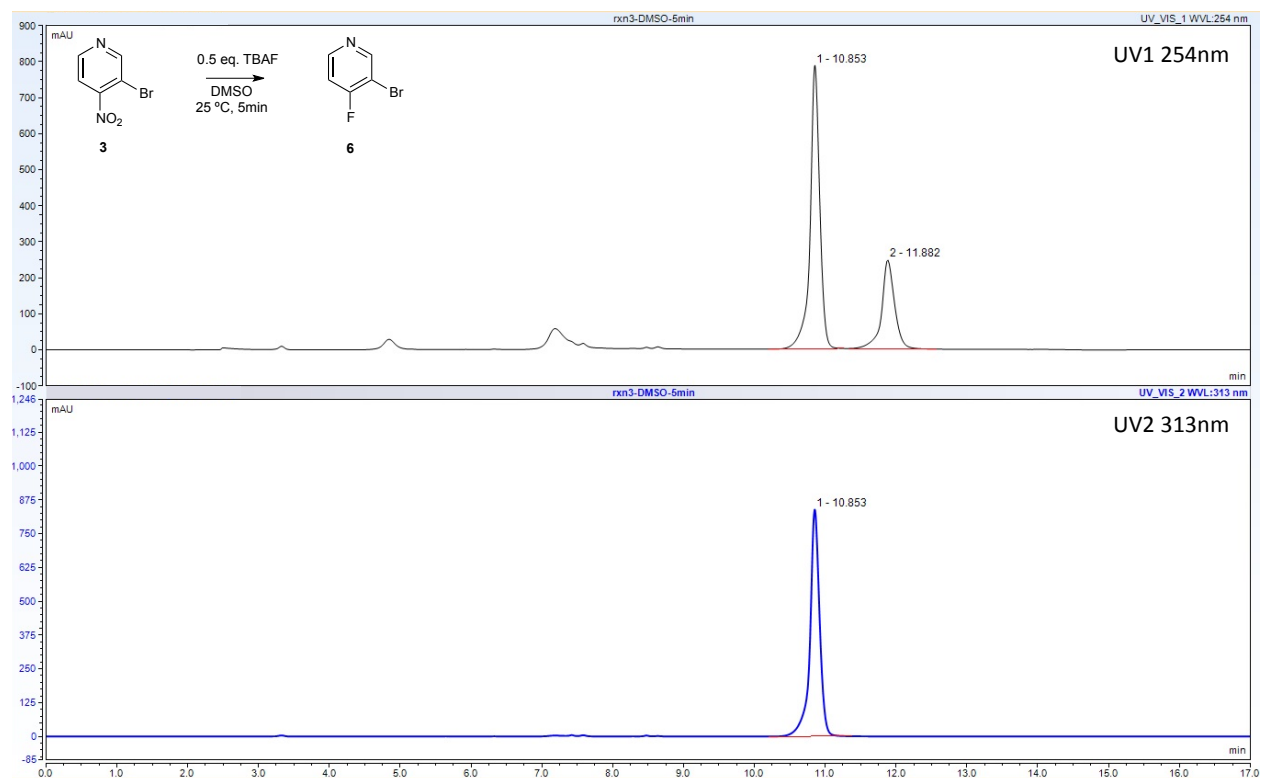

## Elution times:

3-bromo-4-nitropyridine (**3**): 10.85 min – absorbs at 254 and 313 nm3-bromo-4-fluoropyridine (**6**): 11.88 min – absorbs only at 254 nm

1B. NMR

<sup>1</sup>H NMR

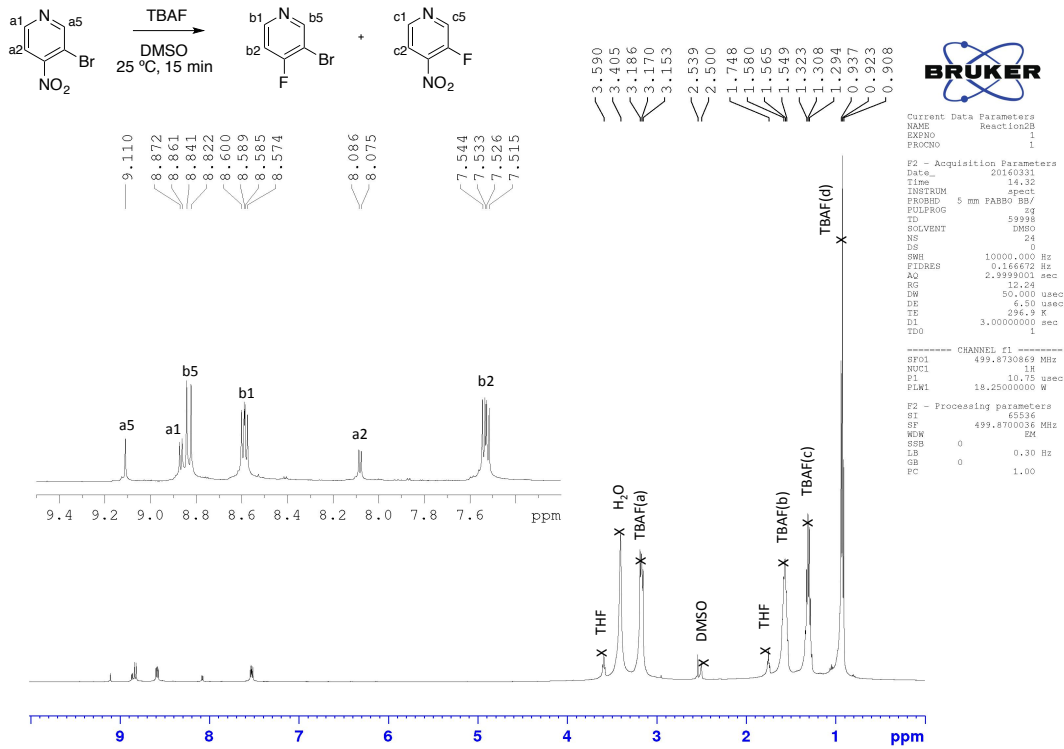

<sup>13</sup>C NMR

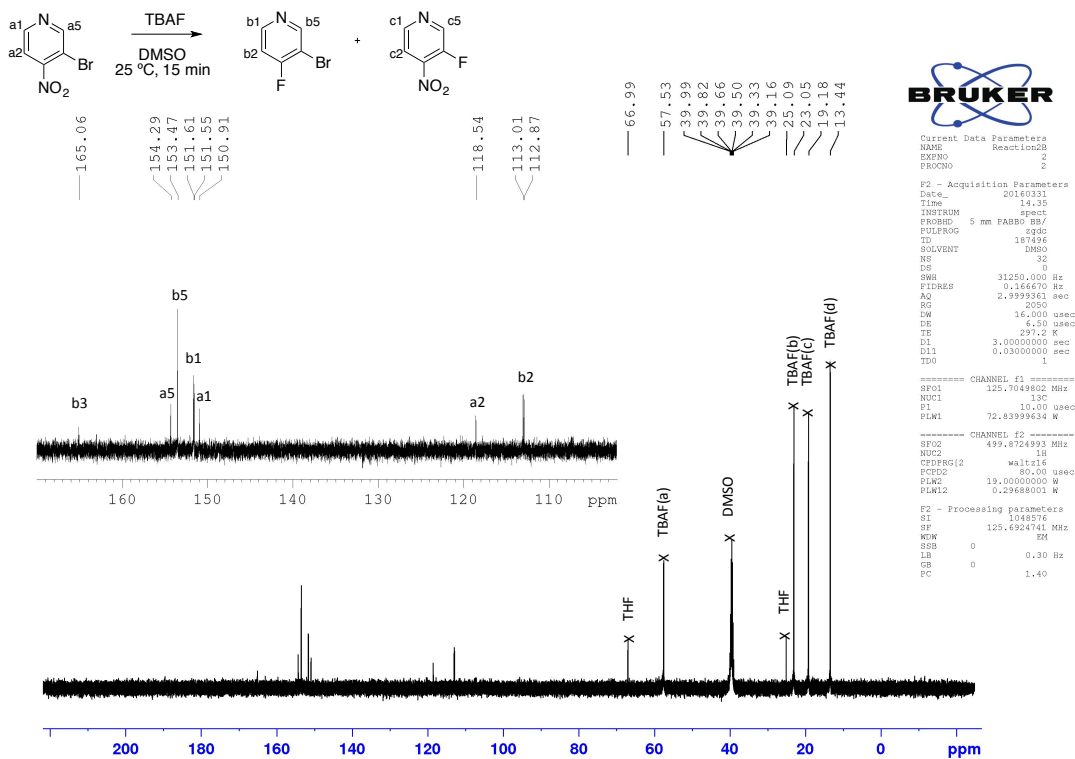

<sup>19</sup>F NMR

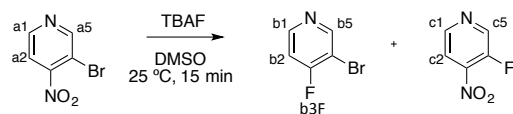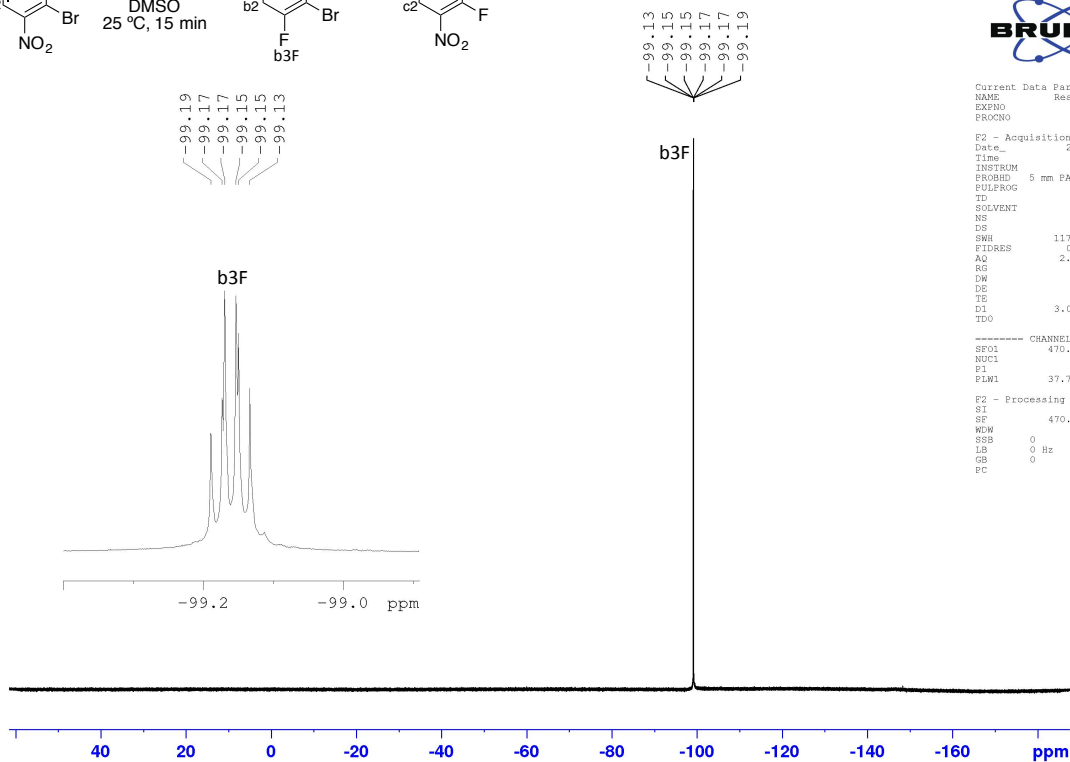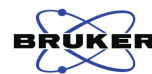

```

Current Data Parameters
NAME      Reaction28
EXPNO    2
PROCNO   3

F2 - Acquisition Parameters
Date_    20160331
Time     14.42
INSTRUM  spect
PROBHD   5 mm PABBO 50/
PULPROG  zgpg30
TD        524288
SOLVENT  DMSO
NS        16
DS        0
SWH       117187.500 Hz
FIDRES    0.223517 Hz
AQ        2.2269621 sec
RG         695.65
DQ        4.267 usec
DE        6.50 usec
TE        297.1 K
D1        3.0000000 sec
TD0       1

----- CHANNEL f1 -----
SFO1     470.3181011 MHz
NUC1     19F
P1       15.00 usec
PL1      37.799999224 W

F2 - Processing parameters
SI       262144
SF       470.3477328 MHz
WDW      no
SSB      0
LB       0 Hz
GB       0
PC       1.00
  
```

## Sup. Fig. 2. Fluorination of 3-iodo-4-nitropyridine

## 2A. UV HPLC trace

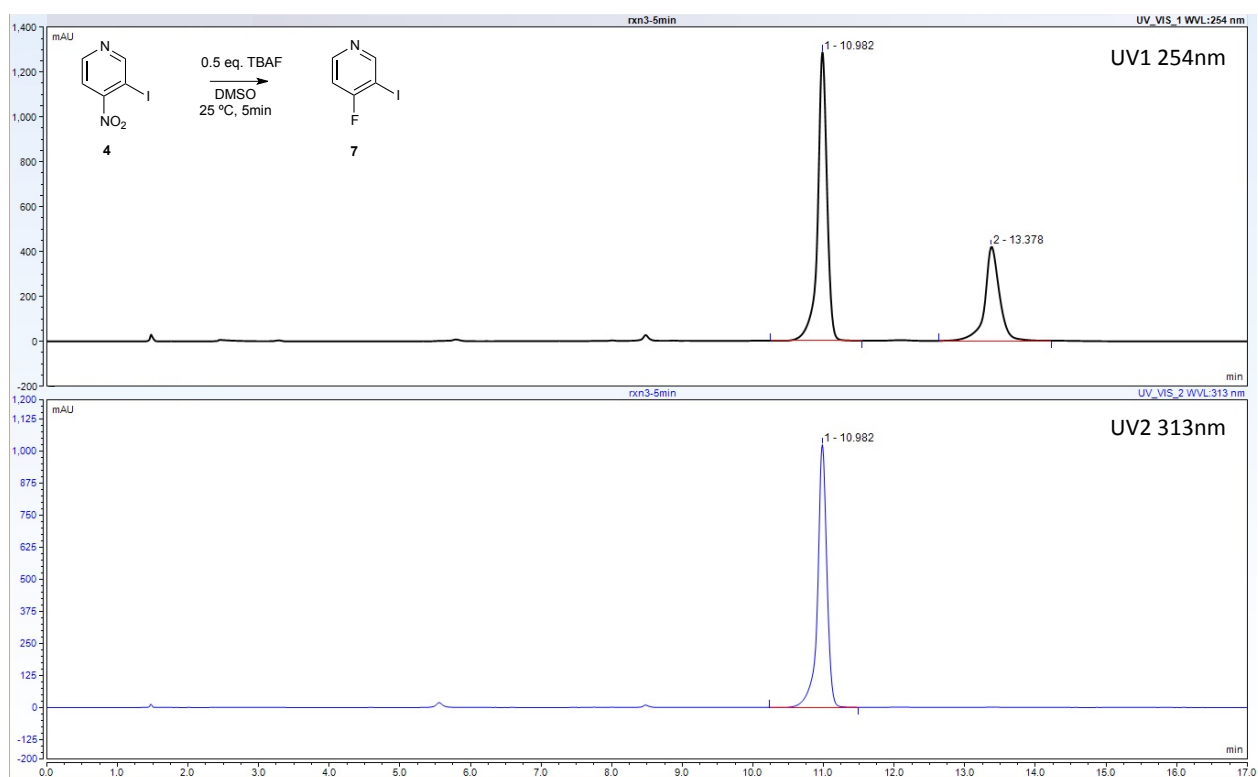

Elution times:

3-iodo-4-nitropyridine (4): 10.98 min – absorbs at 254 and 313 nm

3-iodo-4-fluoropyridine (7): 13.38 min – absorbs only at 254 nm

2B. NMR  
<sup>1</sup>H NMR

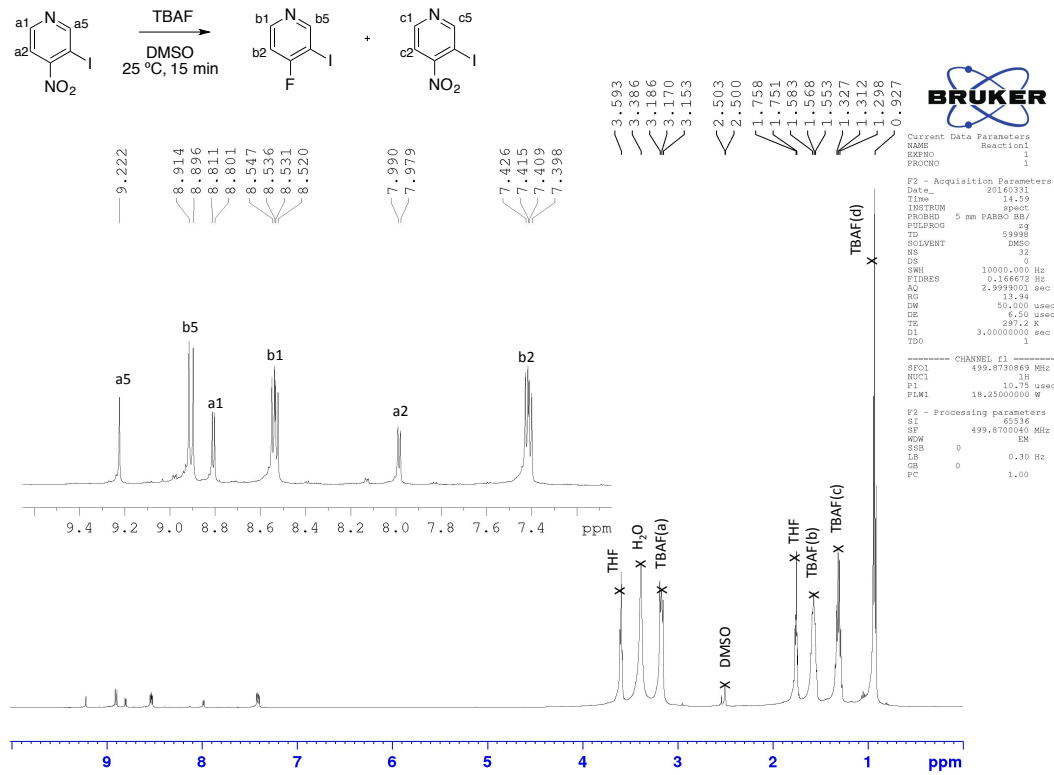

<sup>13</sup>C NMR

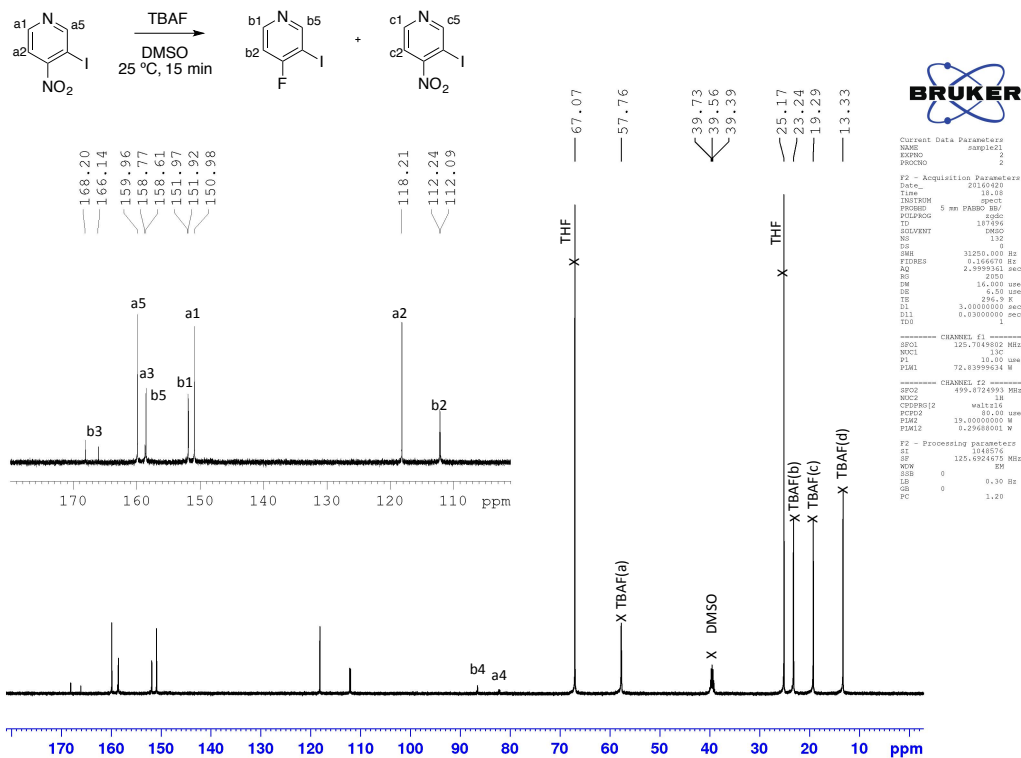

<sup>19</sup>F NMR

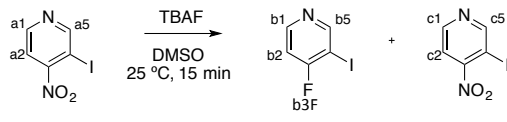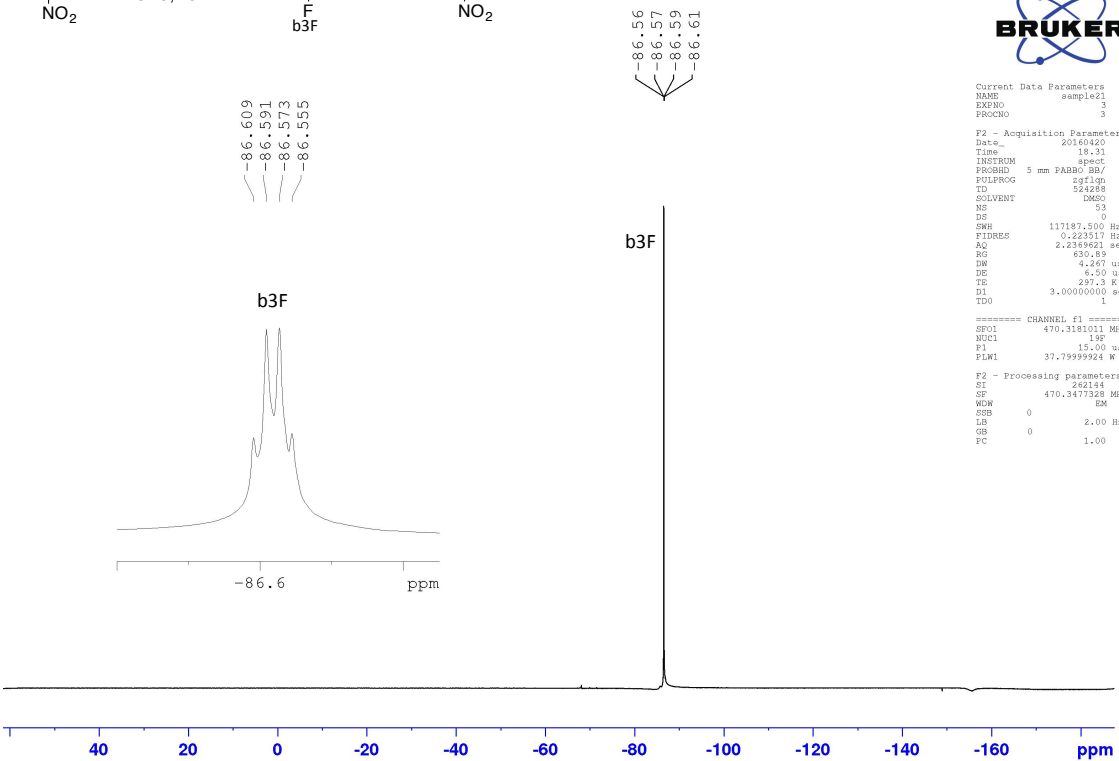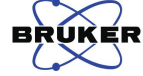

## Sup. Fig. 3. Fluorination of 3-bromo-4-nitropyridine N-oxide

## 3A. UV HPLC trace

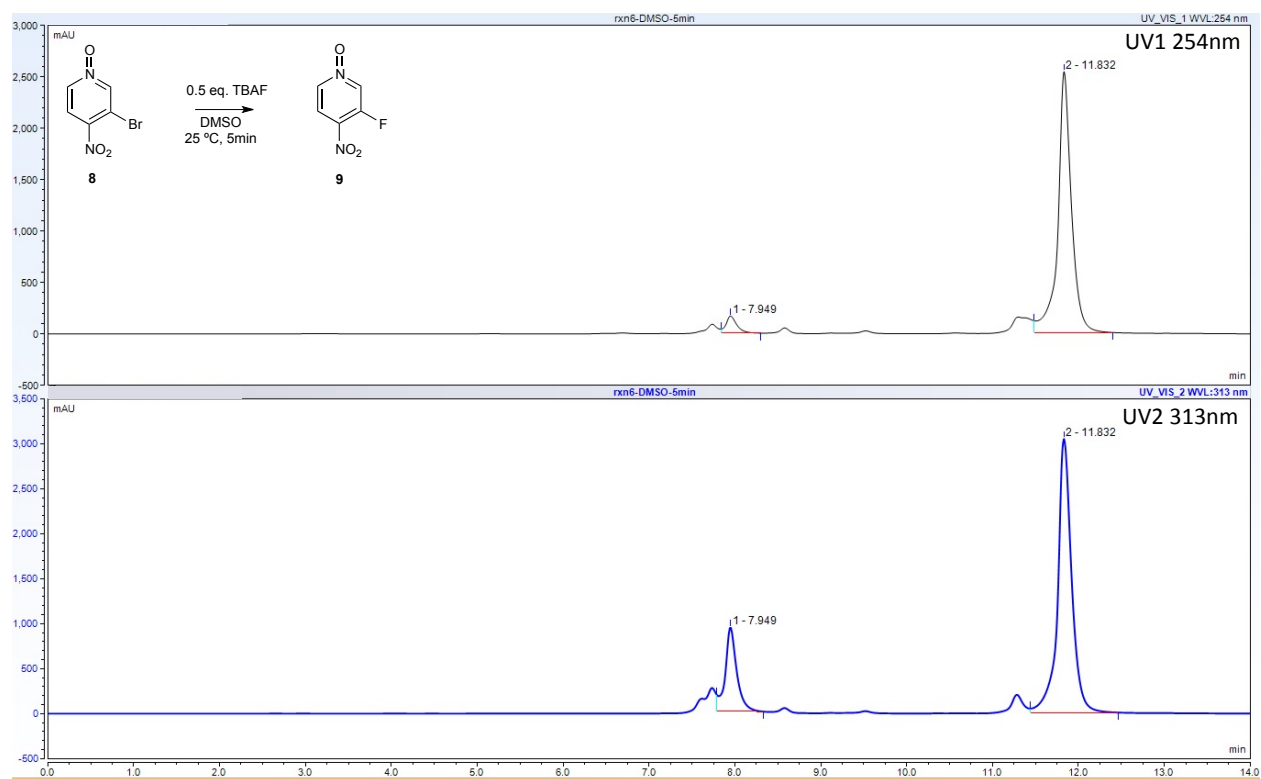

Elution times:

3-bromo-4-nitropyridine N-oxide (**8**): 11.83 min – absorbs at 254 and 313 nm

3-fluoro-4-nitropyridine N-oxide (**9**): 7.95 min – absorbs only at 254 and 313 nm

3B. NMR

<sup>1</sup>H NMR

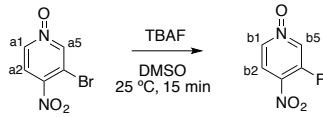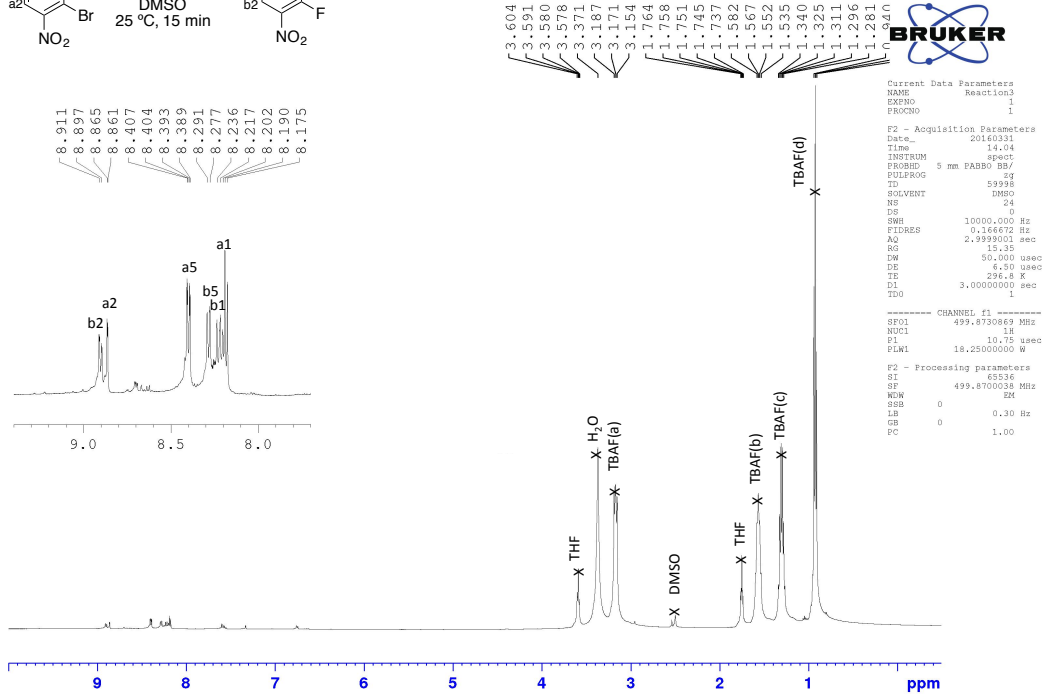

<sup>13</sup>C NMR

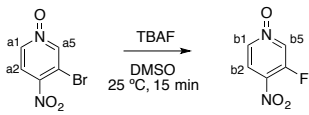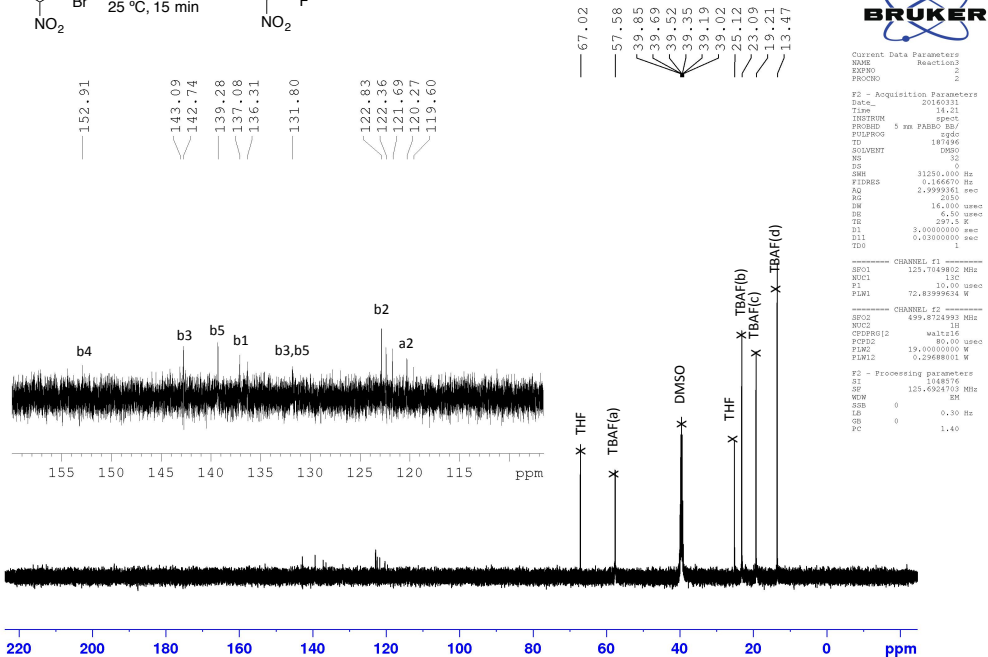



<sup>19</sup>F NMR

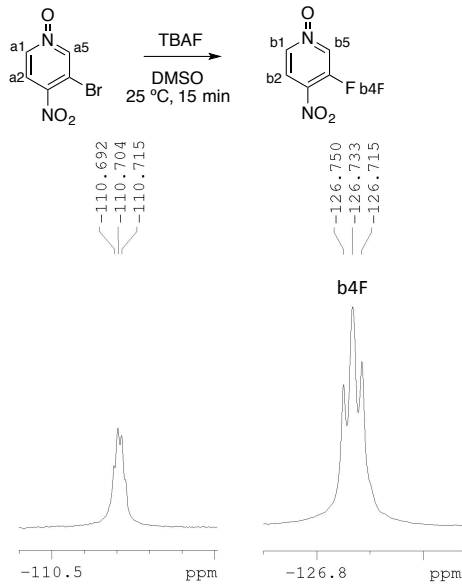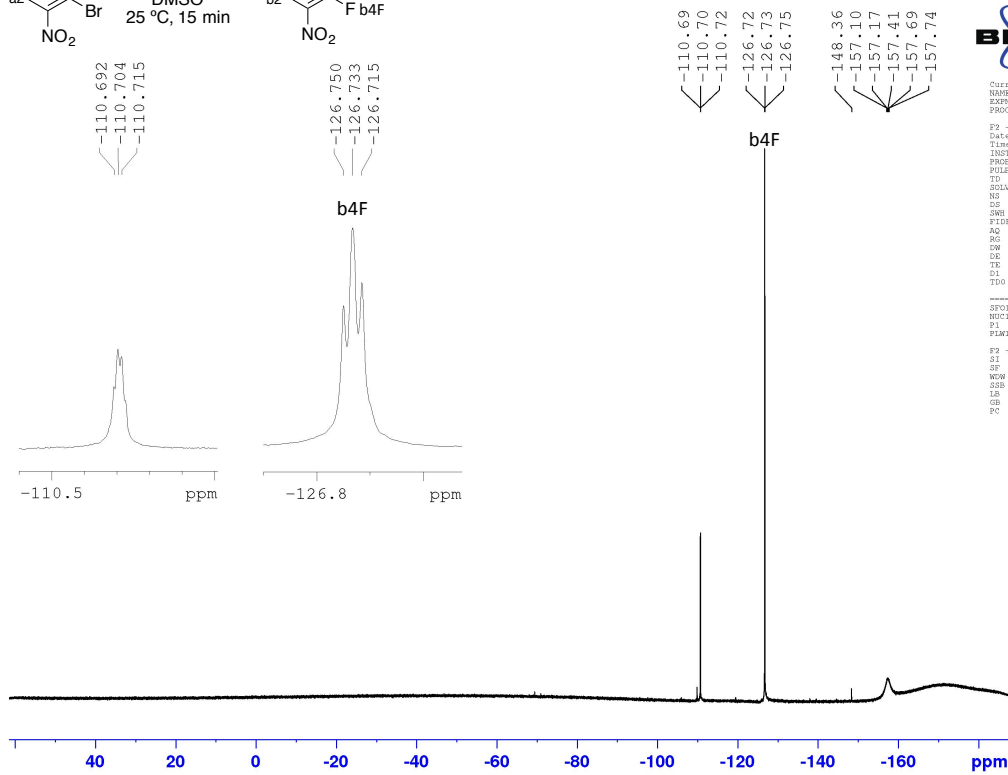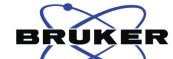

```

Current Data Parameters
NAME      Reaction3
EXPNO    3
PROCNO   3

F2 - Acquisition Parameters
Date_    20160301
Time     13.56
INSTRUM spect
PROBHD   5 mm PABBO BB/
PULPROG zgpg30
TD        524288
SOLVENT  DMSO
NS        24
DS        0
SWH       117187.500 Hz
FIDRES   0.223517 Hz
AQ        2.2289621 sec
RG        584.84
CW        4.267 usec
DE        6.50 usec
TE        300.2 K
D1        3.0000000 sec
TD0       1

----- CHANNEL f1 -----
SFO1     470.3181011 MHz
NUC1     19F
P1        18.00 usec
PLW1     37.78999924 W

F2 - Processing parameters
SI        262144
SF        470.347328 MHz
WDW       EM
SSB       0
LB        2.00 Hz
GB        0
PC        1.00
  
```

**Sup. Fig. 4.** Fluorination of 3-bromopyridine:**4A.** UV HPLC trace.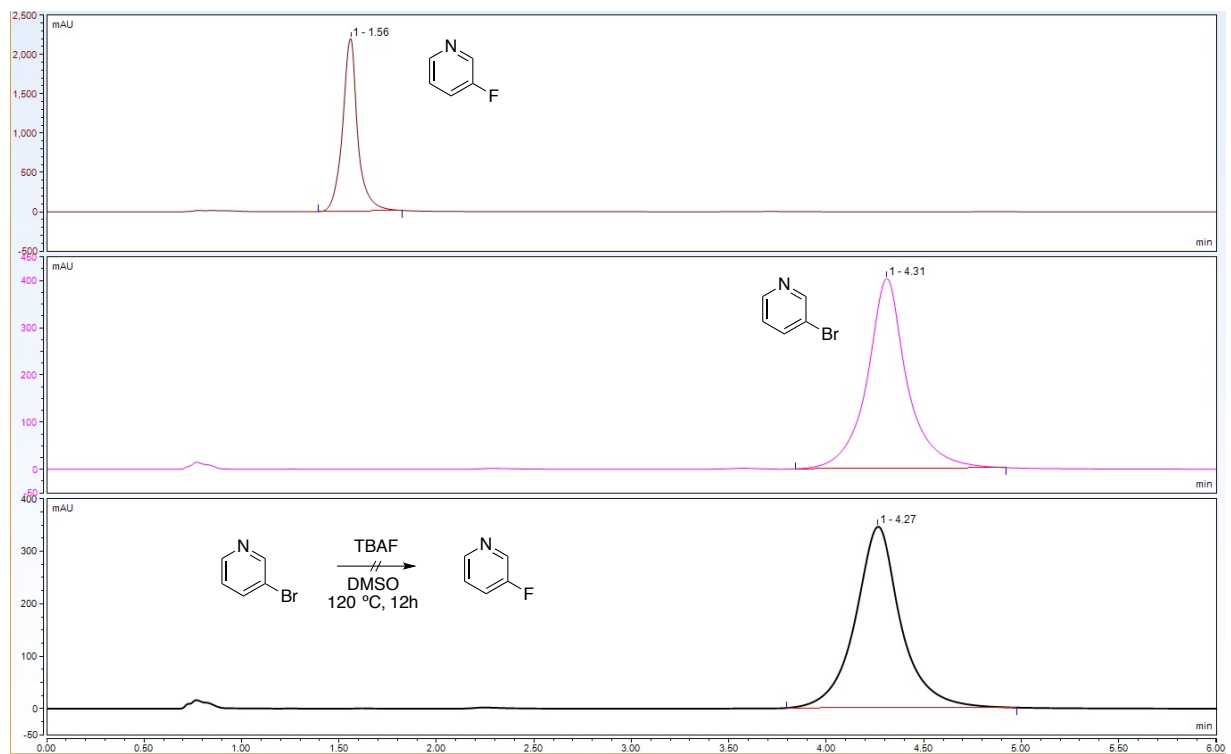

4B. NMR

<sup>1</sup>H NMR

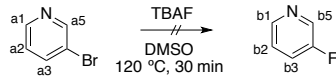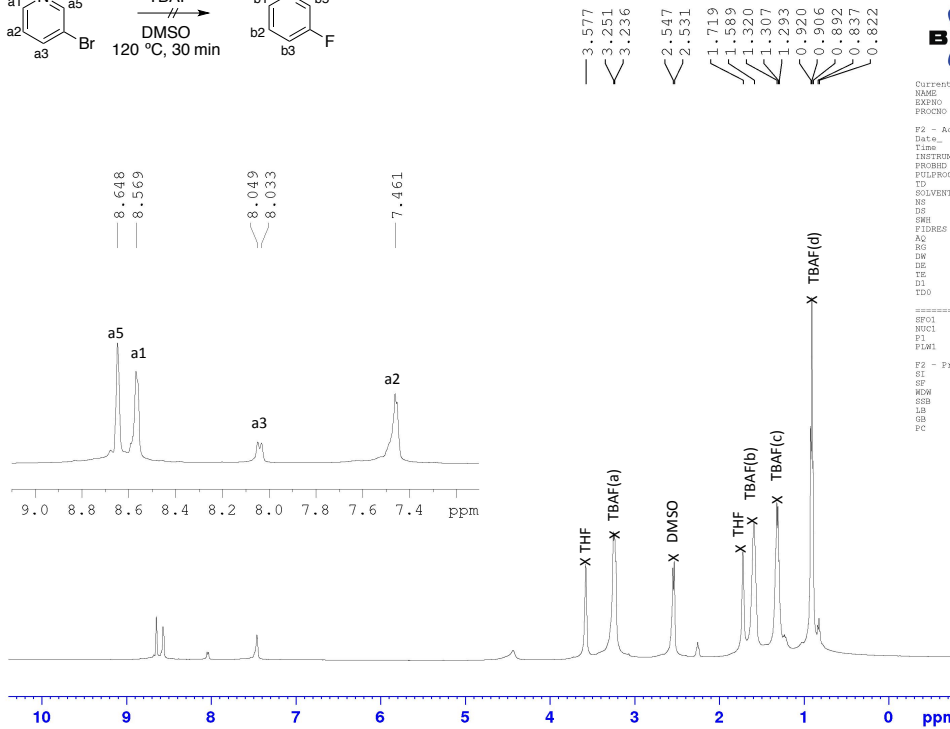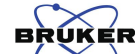

```

Current Data Parameters
NAME: sample22
EXPNO: 1
PROCNO: 1

F2 - Acquisition Parameters
Date_: 20160420
Time: 19.34
INSTRUM: spect
PROBHD: 5 mm PABBO BB/
PULPROG: zgpg
TD: 59998
SOLVENT: DMSO
NS: 36
DS: 0
SWH: 10000.000 Hz
FIDRES: 0.166672 Hz
AQ: 2.9999001 sec
RG: 2.19
DW: 50.000 usec
DE: 6.50 usec
TE: 298.1 K
D1: 3.00000000 sec
TDO: 1

===== CHANNEL f1 =====
SFO1: 499.870869 MHz
NUC1: 1H
P1: 10.75 usec
PLM1: 18.25000000 W

F2 - Processing parameters
SI: 6536
SF: 499.8700127 MHz
WDW: EM
SSB: 0
LB: 0.30 Hz
GB: 0
PC: 1.00
    
```

<sup>13</sup>C NMR

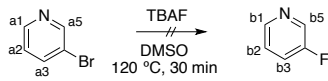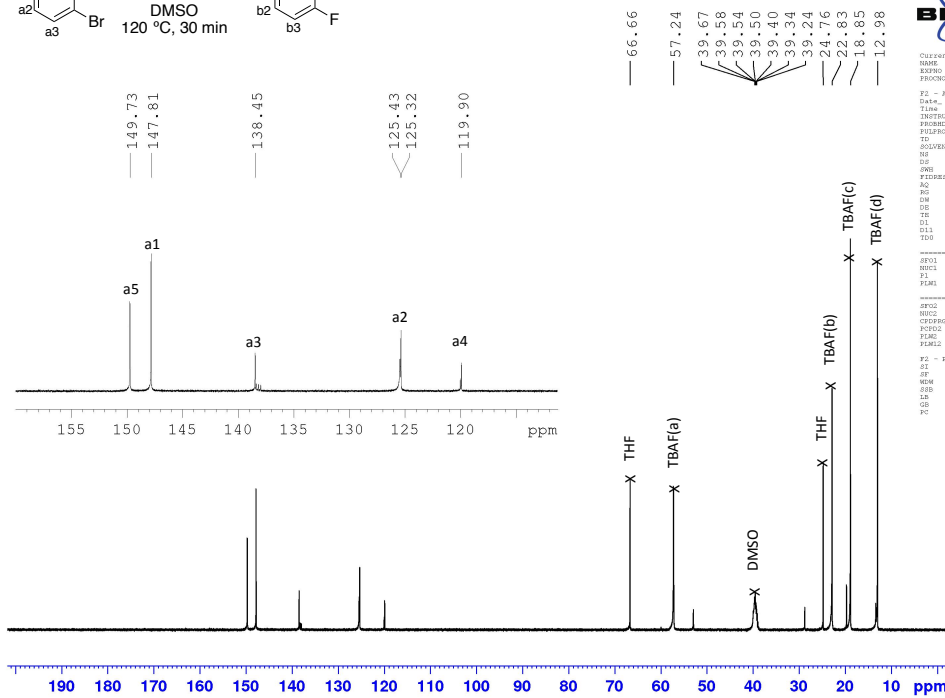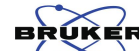

```

Current Data Parameters
NAME: sample22
EXPNO: 2
PROCNO: 2

F2 - Acquisition Parameters
Date_: 20160420
Time: 19.23
INSTRUM: spect
PROBHD: 5 mm PABBO BB/
PULPROG: zgpg
TD: 16766
SOLVENT: DMSO
NS: 103
DS: 0
SWH: 31250.000 Hz
FIDRES: 0.166670 Hz
AQ: 2.9999361 sec
RG: 2.19999361
DW: 16.000 usec
DE: 6.50 usec
TE: 297.1 K
D1: 3.00000000 sec
TDO: 1

===== CHANNEL f1 =====
SFO1: 125.7049802 MHz
NUC1: 13C
P1: 10.00 usec
PLM1: 72.43999936 W

===== CHANNEL f2 =====
SFO2: 499.8728693 MHz
NUC2: 1H
P2: 10.00 usec
PLM2: 19.00000000 W
PLM12: 0.29688001 W

F2 - Processing parameters
SI: 104876
SF: 125.6925104 MHz
WDW: EM
SSB: 0
LB: 0.30 Hz
GB: 0
PC: 1.40
    
```

<sup>19</sup>F NMR

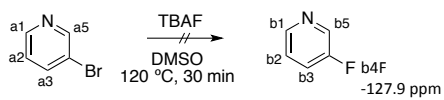

$\begin{matrix} -110.4 \\ \vee \\ -111.3 \end{matrix}$

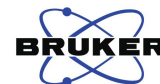

```

Current Data Parameters
NAME      sample22
EXPNO     3
PROCNO    3

F2 - Acquisition Parameters
Date_     20160420
Time      19.41
INSTRUM   spect
PROBHD    5 mm PABBO BBO
PULPROG   zgpg30
TD        32768
SOLVENT   DMSO
NS        23
DS        0
SWH       117187.500 Hz
FIDRES    0.223517 Hz
AQ        2.2369621 sec
RG        499.75
DW        4.267 usec
DE        6.50 usec
TE        297.4 K
D1        3.00000000 sec
TDO       1

===== CHANNEL f1 =====
SFO1      470.3181011 MHz
NUC1      19F
P1        15.00 usec
PLW1     37.79999924 W

F2 - Processing parameters
SI        262144
SF        470.3477328 MHz
WDW       EM
SSB       0
LB        2.00 Hz
GB        0
PC        1.00
    
```

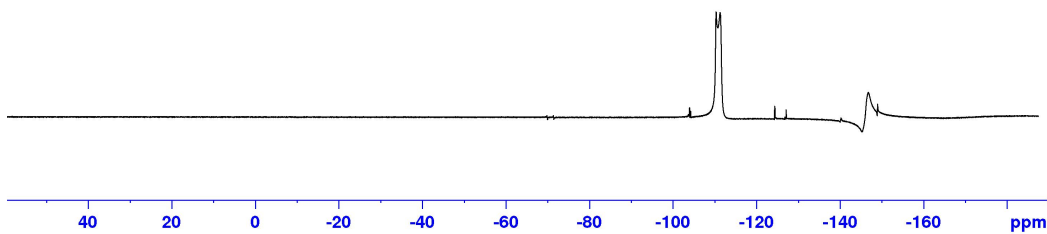

**Sup. Fig. 5.** Fluorination of 3-bromopyridine N-oxide:**5A.** UV HPLC trace.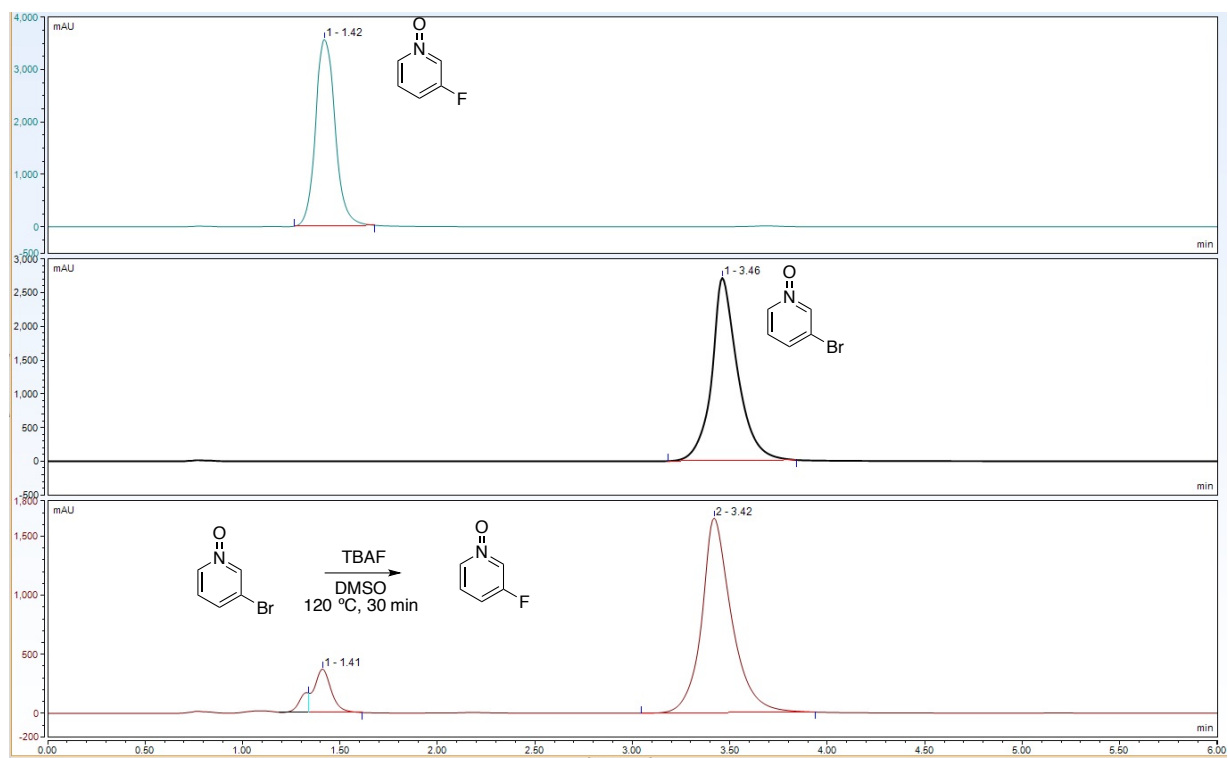

5B. NMR

<sup>1</sup>H NMR

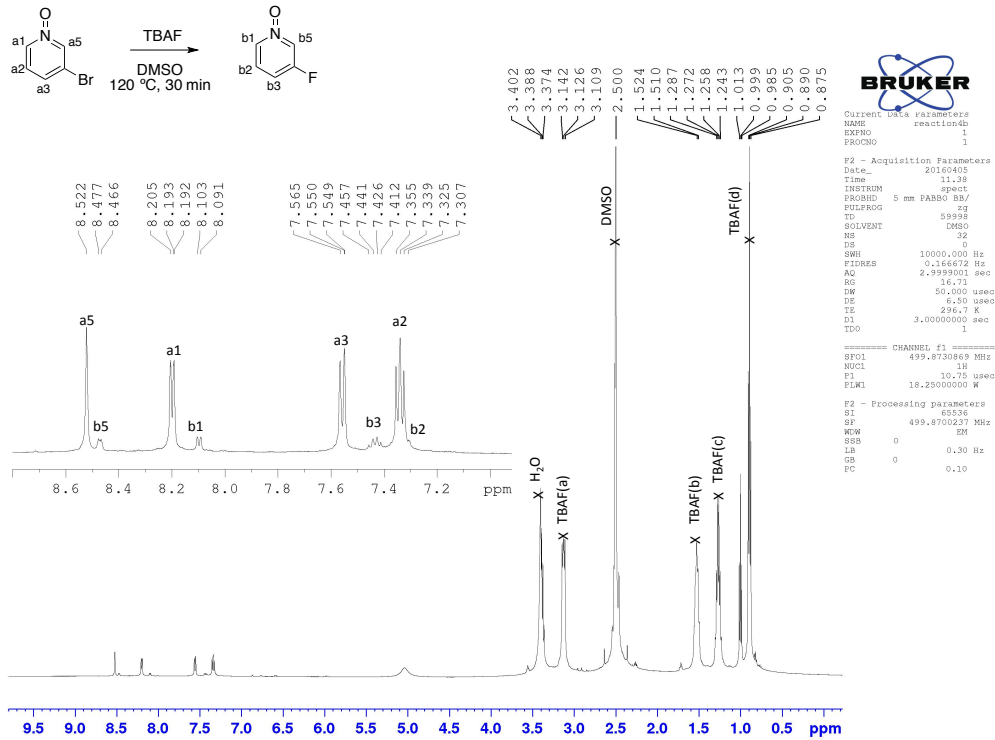

<sup>19</sup>F NMR

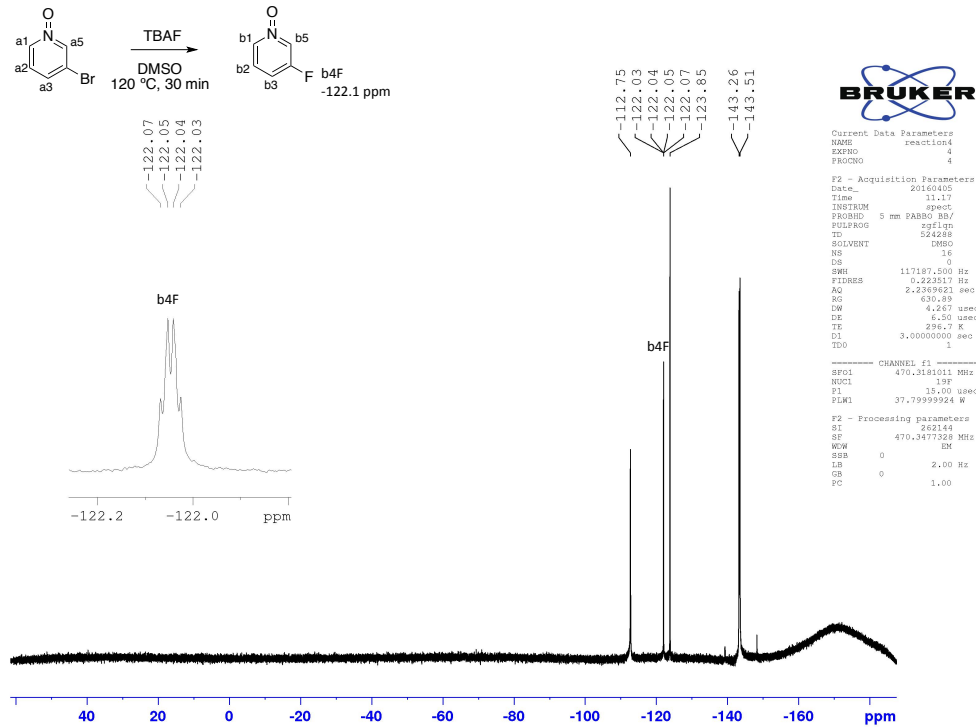

<sup>13</sup>C NMR (replicate reaction sample)

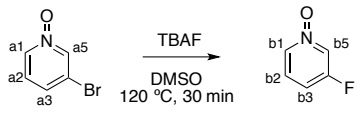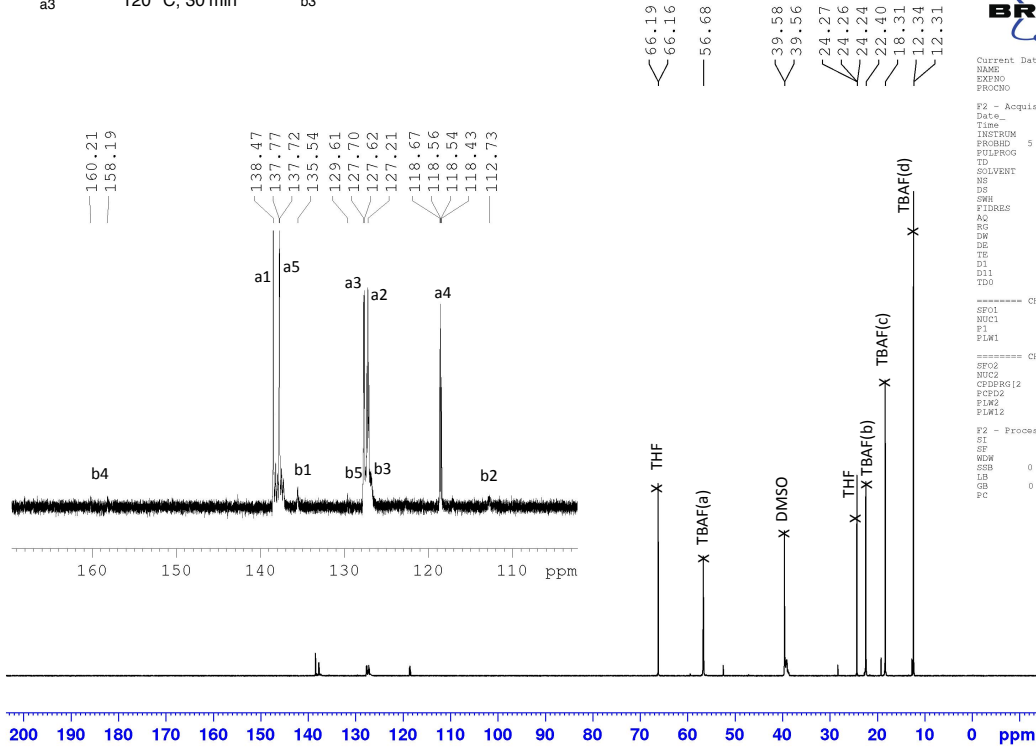

Sup. Fig. 6. UV HPLC traces hydrogenation of 3-fluoro-4-nitropyridine N-oxide (before and after)

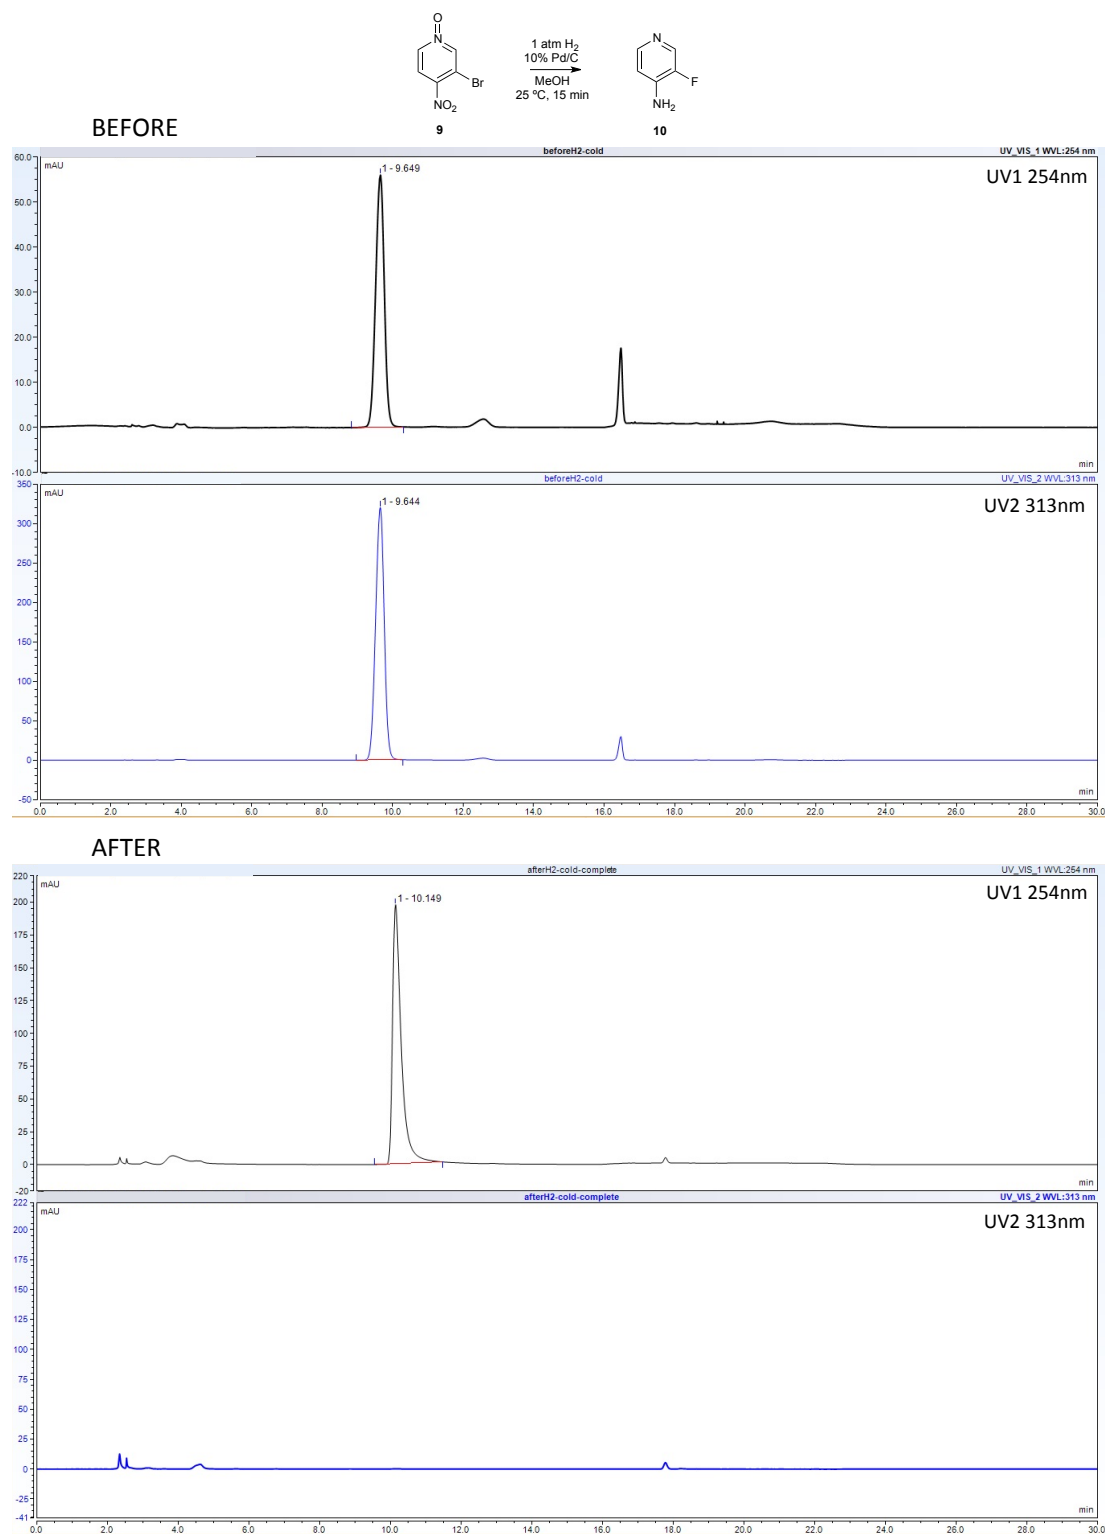



**Sup. Fig. 7.** Radioactive and UV HPLC trace of radiofluorination of 3-bromo-4-nitropyridine N-oxide (not spiked with reference standard)

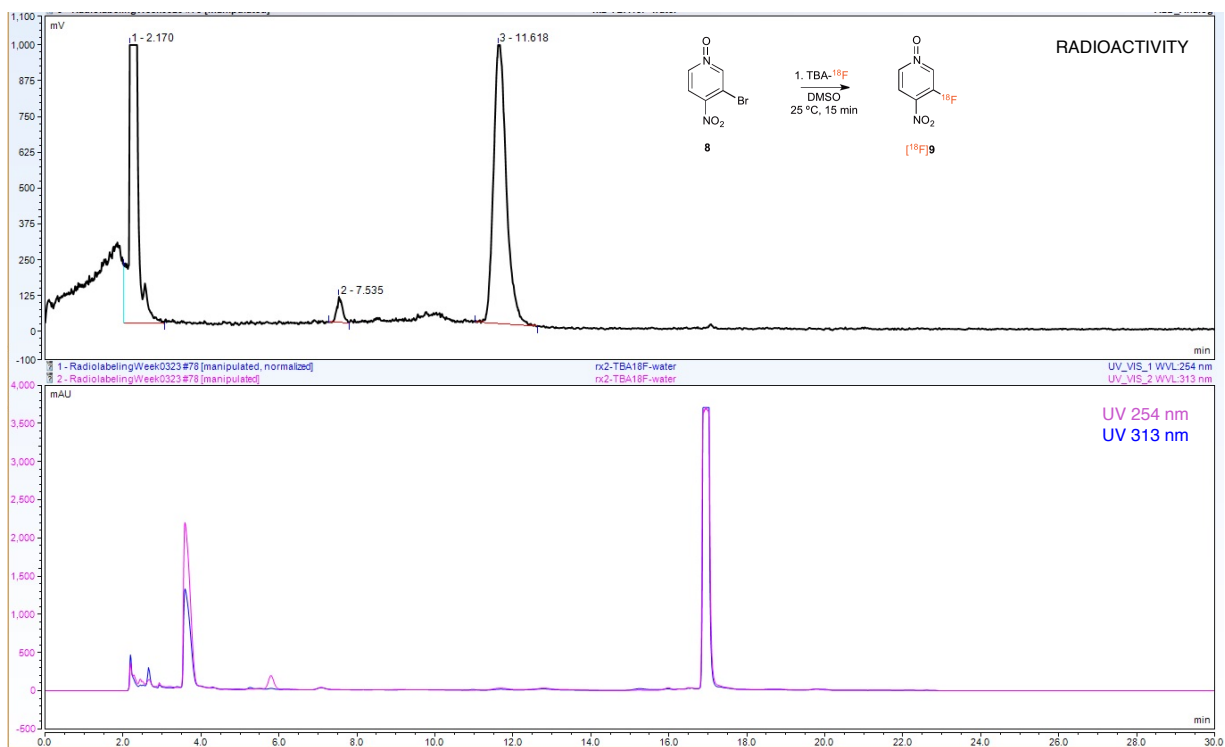

Product elutes at 11.6 min and precursor elutes at 17.2 min.

HPLC conditions: Eclipse XDB 5  $\mu$ m, 9.4 x 250 mm C18 column (Agilent). Flow: 4 mL/min.

Solvent A: 50 mM  $\text{NH}_4\text{HCO}_3$ , pH 8.0. Solvent B: 100% MeOH. Method: 0-13 min: 5% B, 13-14 min: 5-25% B, 14-20 min: 25% B, 20-21 min: 25-5% B, 21-30 min: 5% B.
